# Supplementary material
Source: Research Square preprint supplement (doi:10.21203/rs.3.rs-10043143/v1)
Supplement: Supplementary file 1 [file 7f7e5ee7bd2c115bd735380b.docx]

**Supplementary Material S1. Clause-Citation Matrix for Table 1**

References to "the assessment record" denote the authors' 2023 jurisdiction-by-jurisdiction assessment of the primary code documents (section numbers 4.2.x are internal to that record), updated by the June 2026 currency review. The record is not separately published; every coding basis below names the primary code instrument directly.

**Manuscript:** Regulated, but Unvalidated, Features of Cavity Barrier Requirements, Test-Standard Adequacy and Physical Evidence Across 16 Building Codes

This supplement documents the basis for every cell of the manuscript's Table 1: the 16-jurisdiction by 8-criterion stringency matrix (128 cells in total). For each cell it records the clause, article, section, or standard from which the coding was derived, drawn from the manuscript (Sections 2.2, 3.2 to 3.4, 5.2, 5.3, and the Table 1 Notes) and from the assessment record (its sections 4.1 to 4.4, including 4.2.1 to 4.2.14). Coding convention: Y = criterion present and specified (1 point); C = conditional, that is occupancy-dependent, height-dependent, material-limited, or otherwise qualified (0.5 points); N = absent (0 points). The aggregate score (maximum 8) maps to half-open tier bands spanning the full 0 to 8 range: Tier 1 (High, 6 to 8), Tier 2 (Moderate-High, 3.5 to below 6), Tier 3 (Moderate, 2 to below 3.5), Tier 4 (Low, 0 to below 2). Codings are reproduced from Table 1 exactly as published; this supplement documents them and does not revise them. Where the manuscript's Notes record reliance on English-language secondary sources (France, Germany, Norway, Japan, Russia), that flag is carried into the Note column of the affected rows. Source abbreviations: MS = the manuscript; assessment record = the authors' unpublished 2023 assessment of the primary code documents. The assessment record contains two sections numbered 4.2.13 (India first, then China); they are cited here as assessment record §4.2.13 (India) and assessment record §4.2.13 (China).

**The eight criteria** (MS Section 2.2): (1) mandatory status; (2) building types covered; (3) maximum cavity spacing independent of compartment boundaries; (4) required fire resistance level (FRL); (5) material specification (non-combustible or fire-resisting); (6) dedicated element-level test standard, as distinct from a wall-system test in which barrier performance is incidental; (7) open-state barrier provisions covering activation temperature, closure speed, and intumescent expansion; (8) performance-based compliance alternative.

**Criterion 8 external verification note**

Eight Criterion 8 (performance-based compliance alternative) cells (France, Germany, Norway, Sweden, New Zealand, Japan, Canada, USA) could not be traced to the two source documents and were instead verified externally against authoritative code-body sources in June 2026; each row below carries its instrument, clause, and verification note. All codings stand as published.

| **Jurisdiction** | **Criterion** | **Coding as published** |
| --- | --- | --- |
| France | 8. PB alternative | Y |
| Germany | 8. PB alternative | Y |
| Norway | 8. PB alternative | Y |
| Sweden | 8. PB alternative | C |
| New Zealand | 8. PB alternative | C |
| Japan | 8. PB alternative | C |
| Canada | 8. PB alternative | Y |
| USA | 8. PB alternative | Y |

Result: 128 of 128 cells documented (120 from the assessment record and manuscript; 8 Criterion 8 cells externally verified against authoritative code-body sources, June 2026).

**S1.1 United Kingdom (Score 8.0, Tier 1)**

| **#** | **Criterion** | **Coding** | **Basis (clause / source)** | **Note** |
| --- | --- | --- | --- | --- |
| 1 | Mandatory status | Y | ADB Vol 1, 8.2 and Vol 2, 9.3: cavity barriers mandated to subdivide cavities and close cavity edges; also at junctions with compartment floors/walls (Vol 1, 8.3; Vol 2, 9.3, 9.10) and at protected escape routes (Vol 1, 8.5; Vol 2, 9.4). assessment record §4.2.1; MS 3.2. | Table 1 cell and narrative both cite ADB Vol 1 Section 8 / Vol 2 Section 9 (corrected June 2026 from the legacy working-file locus). |
| 2 | Building types covered | Y | ADB Vol 1 (dwellings), Section 8, plus ADB Vol 2 (buildings other than dwellinghouses), Section 9: parallel provisions covering all building classes. assessment record §4.2.1; MS 3.2. | Cell also records "high-rise B4" (Building Regulations requirement B4, external walls). Assessment reflects England and Wales; Scotland and NI equivalent (Table 1 Notes). |
| 3 | Max spacing | Y | ADB Vol 1, 8.2; Vol 2, 9.6: extensive cavities including roof spaces segmented so no undivided cavity exceeds 20 m in any direction; maximum undivided dimensions further tied to the fire class of the surface exposed within the cavity (Vol 2, 9.6). assessment record §4.2.1; MS 3.2. |  |
| 4 | FRL required | Y | ADB Vol 1, 8.8; Vol 2, 9.8: minimum 30 minutes integrity and 15 minutes insulation (E30 I15). MS 3.2; assessment record §4.2.1. | The assessment record's "up to 120 minutes" language describes what the BS element-level standards can substantiate (MS 5.3), not the ADB minimum. |
| 5 | Material specification | Y | ADB Vol 1, 8.9; Vol 2, 9.9: permitted constructions enumerated (steel, timber, polythene-sleeved mineral wool, mineral wool slab, calcium silicate, cement-based or gypsum-based boards); 2022 amendments extend the prohibition of combustible materials on building exteriors. MS 3.2; assessment record §4.2.1 and comparative Section (ii). | Criterion 5 admits non-combustible or fire-resisting specification (MS 2.2); the ADB list is a fire-resisting construction enumeration. |
| 6 | Dedicated test standard | Y | BS EN 1366-4 (element-level closed-state test), with BS 476-20 and BS 476-22 as supporting fire-resistance methods. assessment record §4.2.1 testing-standard paragraph; MS 3.2, 5.3. | Only jurisdiction of the 16 coded Y on this criterion (MS 3.3). |
| 7 | Open-state addressed | Y | MCRMA GD36 (Cavity Barriers for Ventilated Rainscreen Facades, 2021/2022) and ASFP TGD 19 (Fire Resistance Test for Open State Cavity Barriers, 2022). MS 3.2, 6.1; MS refs [9], [11]. | Only jurisdiction of the 16 coded Y on this criterion (MS 3.3). |
| 8 | PB alternative | Y | assessment record §4.2.1: UK requirements characterized as resting on "detailed performance-based prerequisites"; ADB constitutes statutory guidance to the functional requirements of the Building Regulations, admitting alternative compliance routes. | Characterization-level source statement; no single statutory clause is cited in the sources for this cell. |

**S1.2 France (Score 4.5, Tier 2)**

| **#** | **Criterion** | **Coding** | **Basis (clause / source)** | **Note** |
| --- | --- | --- | --- | --- |
| 1 | Mandatory status | Y | Code de la Construction et de l'Habitation (CCH), Article R.111-14 ("Fire Stops"): cavity barriers required in concealed spaces with location and construction requirements. assessment record §4.2.2; MS 3.2. | Secondary-source reliance flagged (Table 1 Notes; MS 6.5). |
| 2 | Building types covered | C | Coverage limited to enumerated occupancy classes: residential, commercial, and ERP (Etablissements Recevant du Public) per the Table 1 cell; CCH cited at document level. | Document-level citation only; no scoping article identified in the sources. Secondary-source reliance flagged. |
| 3 | Max spacing | N | No maximum spacing provision identified in CCH Article R.111-14 as reviewed (assessment record §4.2.2; assessment record comparative section (ii)). |  |
| 4 | FRL required | Y | CCH Article R.111-14: guidance on construction, installation, and fire-resistance rating of fire stops. assessment record §4.2.2. | Secondary-source reliance flagged. |
| 5 | Material specification | Y | assessment record comparative section (ii): in France, non-combustible, fire-resistant materials are specified for cavity barriers. | Secondary-source reliance flagged. |
| 6 | Dedicated test standard | N | No element-level test standard identified in the CCH as reviewed; assessment record comparative section (ii) records scant detail on testing standards for France. |  |
| 7 | Open-state addressed | N | No open-state provision identified in CCH Article R.111-14 as reviewed. |  |
| 8 | PB alternative | Y | Code de la construction et de l'habitation + Reglement de securite ERP (arrete 25 June 1980): equivalent-effect solutions justified by fire safety engineering study; framework codified by Decret 2025-1100 (Nov 2025, phased from 2026-2027). | Verified June 2026 against Legifrance (JORFTEXT000052611335). External verification supplementing the review sources. |

**S1.3 Germany (Score 5.5, Tier 2)**

| **#** | **Criterion** | **Coding** | **Basis (clause / source)** | **Note** |
| --- | --- | --- | --- | --- |
| 1 | Mandatory status | Y | DIN 4102-4, Section 3.1.6: requires cavity barriers and provides design, material, and fire-resistance guidance. assessment record §4.2.3.1; MS 3.2. | Secondary-source reliance flagged (Table 1 Notes; MS 6.5). |
| 2 | Building types covered | Y | All classes per the Landesbauordnungen (LBO, state building codes) and Musterbauordnung (MBO, model building code), cited at document level in the Table 1 cell. | Document-level citation only; no article number identified in the sources. Secondary-source reliance flagged. |
| 3 | Max spacing | N | No maximum spacing provision identified in DIN 4102-4 Section 3.1.6 or the MBO/LBO provisions as reviewed. |  |
| 4 | FRL required | Y | DIN 4102-4, Section 3.1.6: fire resistance rating guidance for cavity barriers. assessment record §4.2.3.1; MS 3.2. | Secondary-source reliance flagged. |
| 5 | Material specification | Y | DIN 4102-4, Section 3.1.6: materials guidance for cavity barriers. assessment record §4.2.3.1; MS 3.2. | Secondary-source reliance flagged. |
| 6 | Dedicated test standard | C | DIN 4102-20: facade-level (system) test that captures cavity barrier performance only as a component of the tested system, not as an element; conditional credit per Table 1 Notes and MS 3.2. Rig and method detail: assessment record Table 4.2; MS Table 2. | The C coding is an explicit manuscript judgment recorded in the Table 1 Notes. |
| 7 | Open-state addressed | N | No open-state provision identified in DIN 4102-4 / DIN 4102-20 or the MBO/LBO provisions as reviewed. |  |
| 8 | PB alternative | Y | Musterbauordnung Section 67 (Abweichungen): deviation route requiring demonstration of equivalent satisfaction of statutory fire safety objectives; no dedicated FSE clause. | Model code; operative section number varies by Land (commonly 67). Verified June 2026 via MBO text + peer-reviewed analysis (doi 10.1007/s10694-023-01456-x). |

**S1.4 Norway (Score 5.0, Tier 2)**

| **#** | **Criterion** | **Coding** | **Basis (clause / source)** | **Note** |
| --- | --- | --- | --- | --- |
| 1 | Mandatory status | Y | TEK (Technical Regulations under the Planning and Building Act), Section 11-7, "Limitation of Fire Spread in Voids and Cavities": cavity barriers required in concealed spaces. assessment record §4.2.3.2; MS 3.2. | Secondary-source reliance flagged (Table 1 Notes; MS 6.5). |
| 2 | Building types covered | Y | TEK Chapter 11 ("Fire Safety") applies generally; Section 11-7 addresses voids and cavities without occupancy restriction. Table 1 cell: "all classes (TEK Ch. 11)". assessment record §4.2.3.2. | Chapter/section-level citation. Secondary-source reliance flagged. |
| 3 | Max spacing | N | No maximum spacing provision identified in TEK Section 11-7 as reviewed. |  |
| 4 | FRL required | Y | TEK Section 11-7: fire resistance rating guidance for cavity barriers. assessment record §4.2.3.2; MS 3.2. | Secondary-source reliance flagged. |
| 5 | Material specification | Y | TEK Section 11-7: material selection guidance for cavity barriers. assessment record §4.2.3.2; MS 3.2. | Secondary-source reliance flagged. |
| 6 | Dedicated test standard | N | No element-level test standard identified in TEK Section 11-7 as reviewed. |  |
| 7 | Open-state addressed | N | No open-state provision identified in TEK Section 11-7 as reviewed. |  |
| 8 | PB alternative | Y | TEK17 Section 2-2(2)(b): compliance with functional requirements may be documented by analysis (fire: NS 3901 / SN-INSTA/TS 950 per guidance). | Verified June 2026 against DiBK (regulator) official text. |

**S1.5 Sweden (Score 4.5, Tier 2)**

| **#** | **Criterion** | **Coding** | **Basis (clause / source)** | **Note** |
| --- | --- | --- | --- | --- |
| 1 | Mandatory status | Y | Boverket's Building Regulations (BBR), Section 5:533, "Concealed Spaces": barriers required in concealed spaces to limit spread of fire and smoke. assessment record §4.2.3.3; MS 3.2. |  |
| 2 | Building types covered | Y | BBR Chapter 5 ("Fire Safety") applies generally; Section 5:533 addresses concealed spaces without occupancy restriction. Table 1 cell: "all classes (BBR Ch. 5)". assessment record §4.2.3.3. | Chapter/section-level citation. |
| 3 | Max spacing | N | No maximum spacing provision identified in BBR Section 5:533 as reviewed. | The assessment record's summary Table 4.1 is internally inconsistent with its own Sweden text; the manuscript coding (N) follows the verified assessment (MS assembly record, conflict item 6). |
| 4 | FRL required | Y | BBR Section 5:533: guidance on the fire-resistance rating of cavity barriers. assessment record §4.2.3.3; MS 3.2. |  |
| 5 | Material specification | Y | BBR Section 5:533: construction requirements for cavity barriers (fire-resisting construction per the Criterion 5 definition, MS 2.2). assessment record §4.2.3.3. | No explicit non-combustibility clause identified; basis is the 5:533 construction-requirements language. |
| 6 | Dedicated test standard | N | No element-level test standard identified in BBR Section 5:533 as reviewed; assessment record §4.2.3.3 records limited detail on testing. |  |
| 7 | Open-state addressed | N | No open-state provision identified in BBR Section 5:533 as reviewed. |  |
| 8 | PB alternative | C | BBR (BFS 2011:6) Section 5:11/5:112 analytical design route for fire protection; general recommendations were BBRAD (BFS 2011:27). | BBRAD withdrawn July 2024 (route survives via referenced standards); C coding reflects the qualified, recommendation-based form of the route. Verified June 2026 via Boverket. |

**S1.6 Australia (Score 3.0, Tier 3)**

| **#** | **Criterion** | **Coding** | **Basis (clause / source)** | **Note** |
| --- | --- | --- | --- | --- |
| 1 | Mandatory status | C | Two triggers, both pathway-gated (recoded Y to C, June 2026, on verified NCC research). (a) Specification 9, invoked via Clause C2D13, requires cavity barriers within the Deemed-to-Satisfy provisions for fire-protected timber construction only (S9C1 scope statement). (b) Verification Method C2V3(b)(iii) requires cavity barriers at the perimeter of each floor where an external wall system containing a cavity is verified via AS 5113 (ABCB Advisory Note 2022). On the default Deemed-to-Satisfy route for non-combustible facades (Clause C2D10) no cavity barrier duty exists; the cavity is unregulated as a void and floor junctions are governed by FRL continuity and Clause C3D7 spandrel separation (compartmentation mechanisms, not cavity barriers). MS 3.2, 6.2. | Legacy (pre-2022) numbering: Specification C1.13; Clause C1.9; CV3. Sources verified June 2026 via ncc.abcb.gov.au (Spec 9; C3D7 guide) and the ABCB Advisory Note: Fire Performance of External Walls and Cladding (2022). |
| 2 | Building types covered | C | Conditional on construction type: Type A and B construction, Class 2 to 9 buildings (NCC 2022 C2D10; Specification 9). MS Table 1 cell; MS 3.2; assessment record §4.1. | Coverage attaches to construction type rather than all occupancies, hence C. Legacy numbering: C1.9; Spec C1.13. |
| 3 | Max spacing | N | No general maximum cavity spacing provision in NCC 2022 Volume One. Specification 9 prescribes 5 m horizontal / 10 m vertical spacings, but only within fire-protected timber construction; the criterion's general-duty reading therefore codes N. | Spec 9 spacings verified June 2026 via ncc.abcb.gov.au. |
| 4 | FRL required | N | No FRL prescribed for cavity barriers in NCC 2022 Volume One; Specification 9 prescribes barrier composition, not a fire resistance level (MS 3.2). | The assessment record's comparative Section (ii) asserts "minimum fire resistance specified (NCC Specification C3.15)" under legacy NCC 2019 numbering; the manuscript's verified coding is N and governs (MS assembly record, conflict item 5). |
| 5 | Material specification | Y | NCC 2022 Clause C2D10: every component of an external wall in Type A and B construction must be non-combustible (facade coverings, framing, insulation, ancillary elements); non-combustibility assessed per AS 1530.1. Specification 9 prescribes barrier composition (timber, or mineral wool slabs/strips encased in polyethylene). MS 3.2; assessment record §4.1, 4.2.4, 4.4. | Legacy numbering: C1.9; Spec C1.13. |
| 6 | Dedicated test standard | N | No element-level cavity barrier test standard referenced. AS 1530.4 (3 m x 3 m furnace, one-sided exposure) is the referenced fire-resistance method but assesses elements/wall constructions with barrier performance incidental, and cannot mount an open-state specimen. assessment record §4.1 and 4.1 sub-section "Suitability of AS 1530-4"; MS 5.2, 5.3. | MS 5.2 carries the exposure and functional mismatch argument in qualitative form; quantified deltas from the unpublished assessment record are not carried into the manuscript. |
| 7 | Open-state addressed | N | Specification 9 acknowledges cavity barrier products without prescribing open-state performance parameters: no activation temperature, closure speed, or intumescent expansion requirement is identified in NCC 2022 Volume One. MS 3.3, 6.3. | Allowance without parameters codes N, the same logic as the UAE row. The 150 C intumescent activation figure in the assessment record describes industry practice, not a code requirement. |
| 8 | PB alternative | Y | Performance Solutions route (A2G2 assessment methods) against Performance Requirement C1P2; assessment record §4.1: "The NCC also provides scopes for performance-based solutions for the design and implementation of cavity barriers"; Verification Method CV3 with AS 5113 (assessment record, NCC DtS and Performance requirements section, CV3 Clauses 4.1 to 4.5; assessment record §7.3). | Legacy numbering: Performance Requirement CP2. |

**S1.7 New Zealand (Score 4.5, Tier 2)**

| **#** | **Criterion** | **Coding** | **Basis (clause / source)** | **Note** |
| --- | --- | --- | --- | --- |
| 1 | Mandatory status | Y | NZBC Clause C3.7 ("Control of Internal Fire and Smoke Spread"): cavity barriers required in concealed spaces to prevent spread of fire and smoke. assessment record §4.2.5; MS 3.2. |  |
| 2 | Building types covered | Y | NZBC Clause C ("Protection from Fire") applies to buildings generally; Clause C3.7 carries no occupancy restriction. Table 1 cell: "all classes (NZBC C3.7)". assessment record §4.2.5. |  |
| 3 | Max spacing | N | No maximum spacing provision identified in NZBC Clause C3.7 as reviewed. |  |
| 4 | FRL required | Y | NZBC Clause C3.7: required fire-resistance rating for cavity barriers. assessment record §4.2.5; MS 3.2. |  |
| 5 | Material specification | Y | NZBC Clause C3.7: construction and material guidance for cavity barriers (MS 3.2: "FRL requirements and material guidance comparable to Australia and Sweden"; assessment record §4.2.5). |  |
| 6 | Dedicated test standard | N | No element-level test standard identified; assessment record comparative section (iv): New Zealand's referenced standards focus on the overall wall system, barrier performance ancillary and incidental. MS 5.3. |  |
| 7 | Open-state addressed | N | No open-state provision identified in NZBC Clause C3.7 as reviewed. |  |
| 8 | PB alternative | C | Building Act 2004 s 19 (means of compliance) and s 22; Verification Method C/VM2 Framework for Fire Safety Design; alternative-solution route under s 19. | New C/VM2 edition effective 28 July 2025. C coding reflects the verification-method-mediated form of the route. Verified June 2026 via MBIE building.govt.nz. |

**S1.8 Singapore (Score 5.0, Tier 2)**

| **#** | **Criterion** | **Coding** | **Basis (clause / source)** | **Note** |
| --- | --- | --- | --- | --- |
| 1 | Mandatory status | Y | Code of Practice for Fire Precautions in Buildings 2018 (CP 2018), Clause 3.11.1: concealed spaces "shall be sub-divided by construction of cavity barriers to restrict the spread of smoke and flames"; Clause 3.11.2 requires barriers to close cavity edges and openings; Clause 3.11.3 requires fire-resistant barriers abutting cavities to be extended through them. assessment record §4.2.6; MS 3.2. | Provisions retained unchanged, same clause numbering, in the Fire Code 2023 in force since March 2024 (MS 2.2; Table 1 Notes; MS ref [25]). |
| 2 | Building types covered | Y | CP 2018 Clause 3.11 applies to all occupancies; Clause 3.11.1 is a general provision without occupancy restriction. Table 1 cell: "all occupancies (CP Fire Prec. Cl. 3.11)". assessment record §4.2.6; MS 3.2. | Retained in Fire Code 2023. |
| 3 | Max spacing | Y | CP 2018 Clause 3.11.4: cavities including roof spaces shall be subdivided so the maximum distance between cavity barriers does not exceed the dimensions of Table 3.11A. assessment record §4.2.6; Table 1 Notes; MS 3.2, 6.1. | One of only two codes (with the UK) requiring subdivision independent of compartment boundaries (MS 6.1). Retained in Fire Code 2023. |
| 4 | FRL required | Y | CP 2018 Clause 3.11.5(a): cavity barriers constructed to provide at least half-hour fire resistance rating; Clause 3.11.5(b): tight fitting to rigid construction or fire-stopped junctions per Clause 3.12. assessment record §4.2.6; Table 1 Notes. | Retained in Fire Code 2023. |
| 5 | Material specification | Y | Fire-resisting construction specified: CP 2018 Clause 3.11.3 (cavity barriers of fire-resisting construction at least equal to the abutting fire-resistant barrier) and Clause 3.11.5(a) (minimum half-hour FRR). assessment record §4.2.6: the code "outlines specifications for material selection, design and installation". | Criterion 5 admits non-combustible or fire-resisting specification (MS 2.2). |
| 6 | Dedicated test standard | N | No element-level cavity barrier test standard referenced in CP 2018 Clause 3.11; assessment record comparative section (iv): Singapore's referenced standards focus on the overall wall system. MS 3.2, 5.3. |  |
| 7 | Open-state addressed | N | No open-state provision identified in CP 2018 Clause 3.11 (Clause 3.11.6 controls openings in barriers: rated doors, compliant pipes, cables/conduits, dampered ducts). MS 3.2. |  |
| 8 | PB alternative | N | No performance-based compliance alternative for cavity barriers identified in CP 2018 Clause 3.11 (MS 3.2: "no element-level test standard, no open-state provision, and no performance-based alternative, yielding 5.0"). |  |

**S1.9 Japan (Score 2.5, Tier 3)**

| **#** | **Criterion** | **Coding** | **Basis (clause / source)** | **Note** |
| --- | --- | --- | --- | --- |
| 1 | Mandatory status | Y | Building Standard Law (BSL), Article 87 as quoted in assessment record §4.2.7: "Cavity barriers and firestops shall be installed within concealed spaces of buildings in order to prevent spread of fire and smoke." | Secondary source whose primary BSL article number could not be independently confirmed; row treated conservatively and flagged (Table 1 Note d; MS 2.2, 6.5). |
| 2 | Building types covered | C | Coverage unspecified in the source text (Table 1 cell: "coverage unspecified (BSL; see note d)"); conservative coding per MS 2.2. | Table 1 Note d secondary-source flag applies. |
| 3 | Max spacing | N | No maximum spacing provision identified; BSL Enforcement Regulations Clause 187 (as quoted in assessment record §4.2.7) specifies installation locations (joints of walls, floors, ceilings; around pipes, ductwork, openings), not maximum dimensions. | Secondary-source flag applies. |
| 4 | FRL required | N | assessment record §4.2.7: the BSL "does not stipulate the required fire resistance ratings for cavity barriers". | Secondary-source flag applies. |
| 5 | Material specification | C | BSL Enforcement Regulations Clause 188 (as quoted in assessment record §4.2.7): non-combustible materials should be used; materials containing less than 15% organic components may be used if confirmed not to generate flame or smoke. Material-limited conditional per the C definition (Table 1 Notes). | Secondary-source flag applies. |
| 6 | Dedicated test standard | N | assessment record §4.2.7: the BSL does not "provide references to relevant testing standards" for cavity barriers. | JIS A 1310 (assessment record Table 4.2) is a facade screening method, not a code-referenced cavity barrier element test. |
| 7 | Open-state addressed | N | No open-state provision identified in the BSL or its Enforcement Regulations as reviewed. |  |
| 8 | PB alternative | C | Building Standard Law performance-based system (1998 amendment, effective 2000): Route B/C verification per MLIT Notification No. 1433 (31 May 2000); Route C requires Designated Evaluation Body + Ministerial approval. | Old Article 38 repealed in the 1998 reform; cite BSL + Notification 1433. C coding consistent with the conservative Japan treatment (note d). Verified June 2026 via Japanese Law Translation / BCJ. |

**S1.10 Canada (Score 2.5, Tier 3)**

| **#** | **Criterion** | **Coding** | **Basis (clause / source)** | **Note** |
| --- | --- | --- | --- | --- |
| 1 | Mandatory status | Y | NBCC Article 3.1.11 (concealed spaces; MS Table 1 cell, referee-verified). Underlying assessment record §4.2.8 quotes the NBCC text: "Fire stops shall be used to seal around all concealed spaces in which combustible materials form part of the structure" (cited there as Article 3.1.9.1), with design/installation intent (3.1.9.2) and junction locations (3.1.9.4). | Numbering discrepancy on record: manuscript uses NBCC 3.1.11; the assessment record cites NBCC 2019 Section 3.1.9 (MS assembly record, conflict item 2). |
| 2 | Building types covered | C | Conditional: provisions attach to concealed spaces of combustible construction only (assessment record §4.2.8 quoted text: "concealed spaces in which combustible materials form part of the structure"; Table 1 cell: "combustible-construction concealed spaces (NBCC 3.1.11)"). MS 3.2. |  |
| 3 | Max spacing | N | No maximum spacing provision identified in the NBCC concealed-space provisions as reviewed (assessment record §4.2.8). |  |
| 4 | FRL required | N | assessment record §4.2.8: "details regarding ... performance parameters ... are lacking"; MS 3.2: NBCC "is silent on materials performance and testing". |  |
| 5 | Material specification | N | assessment record §4.2.8: "details regarding materials ... are lacking"; MS 3.2: silent on materials. |  |
| 6 | Dedicated test standard | N | No cavity barrier element test referenced in the NBCC provisions as reviewed (assessment record §4.2.8); CAN/ULC S134 (assessment record Table 4.2) is a full-scale facade system method, not an element-level barrier test. MS 5.3. |  |
| 7 | Open-state addressed | N | No open-state provision identified in the NBCC concealed-space provisions as reviewed. |  |
| 8 | PB alternative | Y | NBCC Division A, Article 1.2.1.1.(1)(b): alternative solutions achieving at least the level of performance of Division B acceptable solutions; procedures in Division C, Article 2.3.1. | Principle sits in Division A (procedure in Division C). Verified June 2026 via NRC publications. |

**S1.11 Hong Kong (Score 3.0, Tier 3)**

| **#** | **Criterion** | **Coding** | **Basis (clause / source)** | **Note** |
| --- | --- | --- | --- | --- |
| 1 | Mandatory status | Y | Code of Practice for Fire Safety in Buildings 2011 (June 2023 Edition), p. 98: gaps between curtain wall and building perimeter must be sealed to form an effective fire barrier with FRR equivalent to the floors; external wall systems exceeding a storey in height must be of non-combustible materials. assessment record §4.2.9. | Table 1 cell now cites CP FS 2011 (2023 ed.) directly (corrected June 2026); a legacy working-file pointer to the CP for Minimum Fire Service Installations and Equipment could not be matched to a quoted passage and was retired. |
| 2 | Building types covered | Y | CP FS 2011 (2023 Edition) external wall provisions apply to buildings generally (any external wall system exceeding a storey in height; p. 98). Table 1 cell: "all (CP FS 2011, 2023 ed.)". assessment record §4.2.9. | Basis is the CP FS 2011 (2023 ed.) provisions, as in row 1. Coding justification: the provision applies to external wall systems generally; the storey-height phrasing describes the cavity configuration to be subdivided, not an occupancy or height threshold limiting coverage, so Y rather than C. |
| 3 | Max spacing | N | No maximum cavity spacing provision identified in CP FS 2011 (2023 Edition) as reviewed. Subsection C11's 900 mm spandrel / 500 mm horizontal projection requirements are floor-edge separation measures, not cavity subdivision spacing. assessment record §4.2.9. |  |
| 4 | FRL required | N | No FRL prescribed for cavity barriers as elements; the FRR-equal-to-floor requirements at p. 98 and Subsection C11 attach to curtain-wall perimeter seals and spandrels, not to cavity barriers generally. assessment record §4.2.9 records "gaps in terms of performance metrics". |  |
| 5 | Material specification | Y | CP FS 2011 (2023 Edition), p. 98: external wall systems exceeding a storey in height must be constructed of non-combustible materials (window sealants and gaskets excepted). assessment record §4.2.9; Table 1 cell. |  |
| 6 | Dedicated test standard | N | No element-level cavity barrier test referenced; Subsection E12 directs facade testing to BS EN 1364-3:2006 and BS EN 1364-4:2007, curtain-walling (wall-system) fire resistance tests in which barrier performance is incidental. assessment record §4.2.9; MS 5.3. |  |
| 7 | Open-state addressed | N | No open-state provision identified in CP FS 2011 (2023 Edition) as reviewed. |  |
| 8 | PB alternative | N | No performance-based compliance alternative for cavity barriers identified in CP FS 2011 (2023 Edition) as reviewed. |  |

**S1.12 UAE (Dubai) (Score 3.0, Tier 3)**

| **#** | **Criterion** | **Coding** | **Basis (clause / source)** | **Note** |
| --- | --- | --- | --- | --- |
| 1 | Mandatory status | Y | UAE Fire and Life Safety Code of Practice 2018, Section 4.5.4 (p. 142): cavity fire barriers required at each floor level, horizontally around window openings on all sides, and vertically at every floor where wall cavities are continuous. assessment record §4.2.11; MS 3.2. | Table 1 cell pointer is "DCD COP 7.4". The working papers carry two UAE documents (DCD Code of Practice for Indoor Fire Safety 2018 and UAE Fire and Life Safety Code 2018); whether they are one code is flagged for confirmation (MS assembly record). |
| 2 | Building types covered | Y | Section 4.5.4 facade provisions apply to buildings with external wall cavities generally (assessment record §4.2.11 frames the requirement for multi-storey buildings with cavities in external walls); Table 1 cell: "all (DCD COP 7.4)". | Same dual-document caveat as row 1. Coding justification: the requirement attaches to any building with a cladding cavity rather than to an enumerated occupancy subset; height references describe the building stock, not a coverage limit, so Y rather than C. |
| 3 | Max spacing | N | No maximum-spacing dimension independent of floor levels and openings identified in Section 4.5.4; barriers are prescribed at floor levels and around window openings, which track compartment boundaries rather than a free-standing subdivision interval. assessment record §4.2.11. |  |
| 4 | FRL required | N | No FRR or performance metric specified for the barriers: assessment record §4.2.11 records that the code "lacks specific provisions to validate and ensure the fire resistance and performance of cavity barriers" and "does not specify testing standards, performance metrics". |  |
| 5 | Material specification | Y | Section 4.5.4: cavity fire barriers must be "constructed from non-combustible materials to offer the most effective fire resistance". assessment record §4.2.11; MS 3.2. |  |
| 6 | Dedicated test standard | N | No test standard specified for cavity barriers (assessment record §4.2.11; MS 3.2: "specifies no test standard, performance metric, or closure criterion"). |  |
| 7 | Open-state addressed | N | Section 4.5.4 requires approved intumescent systems where ventilated-facade cavities must be preserved, but prescribes no activation temperature, closure speed, or expansion criterion; coded N against the Criterion 7 definition (MS 2.2, 3.2). | The intumescent-band requirement exists but lacks every performance parameter Criterion 7 demands. |
| 8 | PB alternative | N | No performance-based compliance alternative identified; assessment record §4.2.11: "the regulations lack a performance-based focus and rigour in validating fire resistance". |  |

**S1.13 USA (Score 3.0, Tier 3)**

| **#** | **Criterion** | **Coding** | **Basis (clause / source)** | **Note** |
| --- | --- | --- | --- | --- |
| 1 | Mandatory status | C | IBC Section 718: concealed-space (fireblocking/draftstopping) requirements conditional on building occupancy and construction type (MS 3.2: "conditional architecture"; assessment record §4.2.10: requirements "vary depending on the type of construction and the specific occupancy classification"). State-by-state adoption further fragments application (MS 3.2). | Manuscript uses IBC Section 718 (referee-verified); the assessment record's narrative cites IBC Section 707 (MS assembly record, conflict item 3). |
| 2 | Building types covered | C | Conditional by occupancy: IBC Section 718; NFPA 5000 Section 8.5 ("Concealed Spaces") in parallel; NFPA 101 provides occupancy-classification-based guidance (assessment record §4.2.10 and comparative Section (i); MS 3.2). |  |
| 3 | Max spacing | N | No maximum cavity spacing provision identified in IBC Section 718 or NFPA 5000 Section 8.5 as reviewed. |  |
| 4 | FRL required | C | Fire-resistance requirements apply conditionally: assessment record §4.2.10 records that specific requirements vary with construction type and occupancy classification; coded C per the conditional definition (Table 1 Notes). |  |
| 5 | Material specification | C | Material requirements likewise conditional on construction type and occupancy (assessment record §4.2.10, same passage); coded C (material-limited/conditional per Table 1 Notes definition). |  |
| 6 | Dedicated test standard | N | Referenced methods attach to other elements, not to cavity barriers as elements: ASTM E814 and UL 1479 are penetration-firestop tests (assessment record §4.2.10); ASTM E119 and ANSI/FM Approvals 4411-2020 appear in assessment record Table 4.3, the latter an insurance approvals scheme outside the building code (MS 3.2, 5.1). | ASTM E2912-13 (open-state method) exists as a national standard but is not mandated by the IBC or NFPA 5000 (MS 4.3, 6.3). |
| 7 | Open-state addressed | N | No open-state provision identified in IBC Section 718 or NFPA 5000 Section 8.5 as reviewed (MS 6.3: no jurisdiction assessed mandates ASTM E2912-13). |  |
| 8 | PB alternative | Y | IBC Section 104.11 (2021 edition; Section 104.2.3 in IBC 2024): alternative materials, design and methods, including alternative fire-resistance routes; ICC Performance Code available. | Verified June 2026 via codes.iccsafe.org. |

**S1.14 China (Score 2.5, Tier 3)**

| **#** | **Criterion** | **Coding** | **Basis (clause / source)** | **Note** |
| --- | --- | --- | --- | --- |
| 1 | Mandatory status | Y | GB 50016-2014 (Code of Design of Building Fire Protection and Prevention): general provisions related to cavity barriers; GB 50045-2012 (Code for Fire Protection Design of Tall Buildings) requires barriers at intersections of walls, floors and ceilings, at pipe penetrations, around ventilation ducts, and at other locations isolating concealed spaces. assessment record §4.2.13 (China); MS 3.2. |  |
| 2 | Building types covered | C | Conditional: detailed provisions attach to high-rise buildings only (GB 50045) atop the general code (GB 50016) (MS 3.2: "China's coverage is conditional ... attaching detailed provisions to high-rise buildings"). Table 1 cell: "high-rise only (GB 50016; GB 50045)". |  |
| 3 | Max spacing | N | No maximum cavity spacing provision identified in GB 50016-2014 or GB 50045-2012 as reviewed. |  |
| 4 | FRL required | N | assessment record §4.2.13 (China): the codes "appear to lack details regarding ... precise performance metrics"; no FRL value for cavity barriers identified. |  |
| 5 | Material specification | Y | GB 50045-2012: non-combustible materials specified for cavity barriers, such as mineral wool, calcium silicate boards and gypsum boards. assessment record §4.2.13 (China). |  |
| 6 | Dedicated test standard | N | assessment record §4.2.13 (China): "less focus on testing standards"; no cavity barrier test standard referenced in GB 50016/GB 50045 as reviewed. |  |
| 7 | Open-state addressed | N | No open-state provision identified in GB 50016-2014 or GB 50045-2012 as reviewed. |  |
| 8 | PB alternative | N | No performance-based compliance alternative identified in GB 50016-2014 or GB 50045-2012 as reviewed. |  |

**S1.15 Russia (Score 2.0, Tier 3)**

| **#** | **Criterion** | **Coding** | **Basis (clause / source)** | **Note** |
| --- | --- | --- | --- | --- |
| 1 | Mandatory status | Y | SP 2.13130.2020 (Fire Protection Systems - Ensuring Fire Resistance of Objects of Protection): barriers required to isolate concealed spaces and potential fire spread pathways. assessment record §4.2.14; MS 3.2. | Russia assessed from SP 2.13130.2020 via English-language secondary sources (Table 1 Notes); secondary-source reliance flagged. Conservative coding case per MS 2.2. |
| 2 | Building types covered | C | Coverage unspecified in the source text (Table 1 cell: "concealed spaces, coverage unspecified (SP 2.13130.2020)"); conservative coding per MS 2.2 (Russia named as a principal conservative-coding case). | Secondary-source flag applies. |
| 3 | Max spacing | N | No maximum spacing provision identified in SP 2.13130.2020 as reviewed. |  |
| 4 | FRL required | N | assessment record §4.2.14: SP 2.13130.2020 provides "limited details regarding fire resistance ratings for cavity barriers"; no FRL value identified. MS 3.2. |  |
| 5 | Material specification | C | SP 2.13130.2020 permits barriers of non-combustible or moderately combustible materials (assessment record §4.2.14); the admission of moderately combustible classifications is scored C (Table 1 Notes: "its material requirement permits moderately combustible classifications and is scored C accordingly"). | Secondary-source flag applies. |
| 6 | Dedicated test standard | N | assessment record §4.2.14: "nor are there any references to relevant testing standards or metrics for cavity barrier performance". |  |
| 7 | Open-state addressed | N | No open-state provision identified in SP 2.13130.2020 as reviewed. |  |
| 8 | PB alternative | N | No performance-based compliance alternative identified in SP 2.13130.2020 as reviewed. |  |

**S1.16 India (Score 1.5, Tier 4)**

| **#** | **Criterion** | **Coding** | **Basis (clause / source)** | **Note** |
| --- | --- | --- | --- | --- |
| 1 | Mandatory status | Y | NBC 2016, Part 4 (Fire and Life Safety), Clause 3.5.3: "To prevent spread of fire and smoke through concealed spaces or cavities like air ducts, pipes, service shafts, crawl spaces, ceiling/wall spaces, etc., fire barriers (e.g. fire stops and smoke stops) shall be provided." assessment record §4.2.13 (India); MS 3.2. |  |
| 2 | Building types covered | C | Coverage unspecified: assessment record §4.2.13 (India) records "limited details regarding locations where cavity barriers must be installed"; MS 3.2: "coverage is unspecified, and the code gives minimal implementation guidance". Table 1 cell: "coverage unspecified (NBC 2016 Cl. 3.5.3)". |  |
| 3 | Max spacing | N | No maximum spacing provision identified in NBC 2016 Part 4, Clause 3.5.3 as reviewed. |  |
| 4 | FRL required | N | assessment record §4.2.13 (India): limited details on "required fire resistance ratings"; no FRL value identified in NBC 2016 Part 4. |  |
| 5 | Material specification | N | assessment record §4.2.13 (India): limited details on "materials specifications"; no material requirement identified in NBC 2016 Part 4, Clause 3.5.3. |  |
| 6 | Dedicated test standard | N | assessment record §4.2.13 (India): no "specific references to relevant testing standards for cavity barrier performance". |  |
| 7 | Open-state addressed | N | No open-state provision identified in NBC 2016 Part 4 as reviewed. |  |
| 8 | PB alternative | N | No performance-based compliance alternative identified in NBC 2016 Part 4 as reviewed. |  |

*End of Supplementary Material S1. Total cells: 128 (16 jurisdictions x 8 criteria). Fully documented: 128 (120 from the assessment record and manuscript; 8 Criterion 8 cells externally verified against authoritative code-body sources, June 2026).*
